# Supplementary figures and images for: Mercury determination in soil and sludge samples by HR CS GFAAS: comparison of sample preparation procedures and chemical modifiers
Source: Royal Society of Chemistry journal article supplement (doi:10.1039/c8ja00152a), 2018-01-01

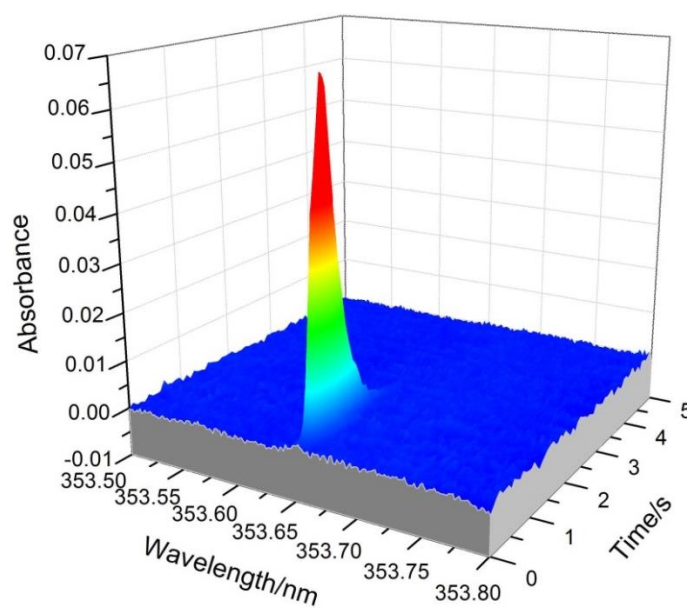

Figure S1. Hg spectrum for the sample prepared by the slurry method with 5  $\mu\text{L}$  of AuNPs.

Supplement: c8ja00152a1.pdf [file c8ja00152a1.pdf]
